# Supplementary material
Source: PubMed Central journal article supplement (PMC3269001)
Supplement: supp_ger066_supp_tables.pdf [file supp_ger066_supp_tables.pdf]

**Supplementary table I.** Description of the allele and genotype frequencies for the studied SNPs and p-value for the Hardy-Weinberg equilibrium in the control group of the study population.

| SNP                    | Allele/Genotype frequency<br>all subjects | Allele/Genotype frequency<br>cases | Allele/Genotype frequency<br>controls | Hardy-Weinberg<br>equilibrium<br>p-value for controls |
|------------------------|-------------------------------------------|------------------------------------|---------------------------------------|-------------------------------------------------------|
| <b>APOE_rs405509</b>   |                                           |                                    |                                       | 0.3                                                   |
| C                      | 0.55                                      | 0.55                               | 0.56                                  |                                                       |
| A                      | 0.45                                      | 0.45                               | 0.44                                  |                                                       |
| C/C                    | 0.31                                      | 0.31                               | 0.31                                  |                                                       |
| C/A                    | 0.48                                      | 0.49                               | 0.48                                  |                                                       |
| A/A                    | 0.21                                      | 0.21                               | 0.20                                  |                                                       |
| <b>APOE_rs439401</b>   |                                           |                                    |                                       | 0.046                                                 |
| C                      | 0.58                                      | 0.58                               | 0.57                                  |                                                       |
| T                      | 0.42                                      | 0.42                               | 0.43                                  |                                                       |
| C/C                    | 0.34                                      | 0.34                               | 0.34                                  |                                                       |
| C/T                    | 0.47                                      | 0.47                               | 0.47                                  |                                                       |
| T/T                    | 0.19                                      | 0.19                               | 0.19                                  |                                                       |
| <b>APOE_rs7259620</b>  |                                           |                                    |                                       | 0.12                                                  |
| G                      | 0.53                                      | 0.54                               | 0.53                                  |                                                       |
| A                      | 0.47                                      | 0.46                               | 0.47                                  |                                                       |
| G/G                    | 0.29                                      | 0.30                               | 0.29                                  |                                                       |
| G/A                    | 0.48                                      | 0.48                               | 0.48                                  |                                                       |
| A/A                    | 0.23                                      | 0.22                               | 0.23                                  |                                                       |
| <b>LIPC_rs12913969</b> |                                           |                                    |                                       | 1.00                                                  |
| G                      | 0.9                                       | 0.9                                | 0.9                                   |                                                       |
| A                      | 0.1                                       | 0.1                                | 0.1                                   |                                                       |
| G/G                    | 0.81                                      | 0.80                               | 0.81                                  |                                                       |
| G/A                    | 0.18                                      | 0.19                               | 0.18                                  |                                                       |
| A/A                    | 0.01                                      | 0.01                               | 0.01                                  |                                                       |
| <b>LIPC_rs16940302</b> |                                           |                                    |                                       | 0.0004                                                |
| C                      | 0.89                                      | 0.88                               | 0.89                                  |                                                       |
| T                      | 0.11                                      | 0.12                               | 0.11                                  |                                                       |
| C/C                    | 0.79                                      | 0.78                               | 0.8                                   |                                                       |
| C/T                    | 0.19                                      | 0.21                               | 0.18                                  |                                                       |
| T/T                    | 0.02                                      | 0.01                               | 0.02                                  |                                                       |
| <b>LIPC_rs16940372</b> |                                           |                                    |                                       | 0.18                                                  |
| A                      | 0.84                                      | 0.85                               | 0.83                                  |                                                       |
| G                      | 0.16                                      | 0.15                               | 0.17                                  |                                                       |
| A/A                    | 0.71                                      | 0.72                               | 0.70                                  |                                                       |
| A/G                    | 0.26                                      | 0.26                               | 0.27                                  |                                                       |
| G/G                    | 0.03                                      | 0.02                               | 0.03                                  |                                                       |
| <b>LIPC_rs17190510</b> |                                           |                                    |                                       | 0.35                                                  |
| G                      | 0.87                                      | 0.87                               | 0.87                                  |                                                       |
| C                      | 0.13                                      | 0.13                               | 0.13                                  |                                                       |
| G/G                    | 0.76                                      | 0.76                               | 0.76                                  |                                                       |
| G/C                    | 0.22                                      | 0.22                               | 0.22                                  |                                                       |
| C/C                    | 0.02                                      | 0.02                               | 0.02                                  |                                                       |
| <b>LIPC_rs1800588</b>  |                                           |                                    |                                       | 0.031                                                 |
| C                      | 0.81                                      | 0.81                               | 0.81                                  |                                                       |
| T                      | 0.19                                      | 0.19                               | 0.19                                  |                                                       |
| C/C                    | 0.66                                      | 0.66                               | 0.66                                  |                                                       |
| C/T                    | 0.30                                      | 0.30                               | 0.30                                  |                                                       |
| T/T                    | 0.04                                      | 0.04                               | 0.04                                  |                                                       |
| <b>LIPC_rs2099190</b>  |                                           |                                    |                                       | 0.59                                                  |
| C                      | 0.54                                      | 0.54                               | 0.54                                  |                                                       |
| A                      | 0.46                                      | 0.46                               | 0.46                                  |                                                       |
| C/C                    | 0.29                                      | 0.29                               | 0.29                                  |                                                       |
| C/A                    | 0.51                                      | 0.51                               | 0.51                                  |                                                       |
| A/A                    | 0.21                                      | 0.21                               | 0.21                                  |                                                       |
| <b>LIPC_rs3751542</b>  |                                           |                                    |                                       | 0.51                                                  |
| A                      | 0.7                                       | 0.71                               | 0.69                                  |                                                       |
| G                      | 0.3                                       | 0.29                               | 0.31                                  |                                                       |
| A/A                    | 0.50                                      | 0.51                               | 0.48                                  |                                                       |
| A/G                    | 0.41                                      | 0.41                               | 0.42                                  |                                                       |
| G/G                    | 0.09                                      | 0.08                               | 0.10                                  |                                                       |

| SNP                   | Allele/Genotype frequencies |       |          | Hardy-Weinberg                      |
|-----------------------|-----------------------------|-------|----------|-------------------------------------|
|                       | all subjects                | cases | controls | equilibrium<br>p-value for controls |
| <b>LIPC_rs4774302</b> |                             |       |          | 0.39                                |
| T                     | 0.58                        | 0.56  | 0.59     |                                     |
| C                     | 0.42                        | 0.44  | 0.41     |                                     |
| T/T                   | 0.34                        | 0.33  | 0.36     |                                     |
| T/C                   | 0.47                        | 0.47  | 0.47     |                                     |
| C/C                   | 0.19                        | 0.20  | 0.17     |                                     |
| <b>LIPC_rs4775053</b> |                             |       |          | 0.55                                |
| C                     | 0.9                         | 0.89  | 0.9      |                                     |
| T                     | 0.1                         | 0.11  | 0.1      |                                     |
| C/C                   | 0.81                        | 0.82  | 0.80     |                                     |
| C/T                   | 0.18                        | 0.18  | 0.19     |                                     |
| T/T                   | 0.01                        | 0.01  | 0.01     |                                     |
| <b>LIPC_rs4775072</b> |                             |       |          | 0.46                                |
| C                     | 0.96                        | 0.96  | 0.97     |                                     |
| T                     | 0.04                        | 0.04  | 0.03     |                                     |
| C/C                   | 0.92                        | 0.91  | 0.93     |                                     |
| C/T                   | 0.07                        | 0.08  | 0.06     |                                     |
| T/T                   | 0.00                        | 0.00  | 0.00     |                                     |
| <b>LIPC_rs6083</b>    |                             |       |          | 0.31                                |
| A                     | 0.67                        | 0.68  | 0.65     |                                     |
| G                     | 0.33                        | 0.32  | 0.35     |                                     |
| A/A                   | 0.44                        | 0.46  | 0.43     |                                     |
| A/G                   | 0.44                        | 0.44  | 0.44     |                                     |
| G/G                   | 0.11                        | 0.10  | 0.13     |                                     |
| <b>LIPC_rs634746</b>  |                             |       |          | 0.75                                |
| C                     | 0.69                        | 0.69  | 0.69     |                                     |
| T                     | 0.31                        | 0.31  | 0.31     |                                     |
| C/C                   | 0.47                        | 0.47  | 0.47     |                                     |
| C/T                   | 0.43                        | 0.43  | 0.43     |                                     |
| T/T                   | 0.10                        | 0.10  | 0.10     |                                     |
| <b>LIPC_rs7166788</b> |                             |       |          | 0.2                                 |
| C                     | 0.59                        | 0.6   | 0.57     |                                     |
| G                     | 0.41                        | 0.4   | 0.43     |                                     |
| C/C                   | 0.34                        | 0.35  | 0.33     |                                     |
| C/G                   | 0.48                        | 0.49  | 0.47     |                                     |
| G/G                   | 0.17                        | 0.15  | 0.19     |                                     |
| <b>LIPC_rs7174210</b> |                             |       |          | 0.46                                |
| G                     | 0.9                         | 0.9   | 0.89     |                                     |
| T                     | 0.1                         | 0.1   | 0.11     |                                     |
| G/G                   | 0.80                        | 0.80  | 0.80     |                                     |
| G/T                   | 0.18                        | 0.18  | 0.19     |                                     |
| T/T                   | 0.01                        | 0.01  | 0.01     |                                     |
| <b>LIPC_rs8035006</b> |                             |       |          | 0.63                                |
| T                     | 0.58                        | 0.58  | 0.58     |                                     |
| A                     | 0.42                        | 0.42  | 0.42     |                                     |
| T/T                   | 0.34                        | 0.35  | 0.33     |                                     |
| T/A                   | 0.48                        | 0.47  | 0.49     |                                     |
| A/A                   | 0.18                        | 0.19  | 0.18     |                                     |
| <b>LIPC_rs9652472</b> |                             |       |          | 0.48                                |
| A                     | 0.92                        | 0.91  | 0.93     |                                     |
| G                     | 0.08                        | 0.09  | 0.07     |                                     |
| A/A                   | 0.85                        | 0.83  | 0.86     |                                     |
| A/G                   | 0.15                        | 0.16  | 0.13     |                                     |
| G/G                   | 0.01                        | 0.01  | 0.01     |                                     |
| <b>LPL_rs268</b>      |                             |       |          | 1.00                                |
| A                     | 0.99                        | 0.99  | 0.99     |                                     |
| G                     | 0.01                        | 0.01  | 0.01     |                                     |
| A/A                   | 0.98                        | 0.98  | 0.99     |                                     |
| A/G                   | 0.02                        | 0.02  | 0.01     |                                     |
| G/G                   | 0.00                        | 0.00  | 0.00     |                                     |
| <b>LPL_rs328</b>      |                             |       |          | 0.7                                 |
| C                     | 0.9                         | 0.9   | 0.9      |                                     |
| G                     | 0.1                         | 0.1   | 0.1      |                                     |
| C/C                   | 0.81                        | 0.80  | 0.81     |                                     |
| C/G                   | 0.18                        | 0.19  | 0.18     |                                     |
| G/G                   | 0.01                        | 0.01  | 0.01     |                                     |

| SNP                     | Allele/Genotype frequencies<br>all subjects | Allele/Genotype frequencies<br>cases | Allele/Genotype frequencies<br>controls | Hardy-Weinberg<br>equilibrium<br>p-value for controls |
|-------------------------|---------------------------------------------|--------------------------------------|-----------------------------------------|-------------------------------------------------------|
| <b>CYP1A2_rs2470890</b> |                                             |                                      |                                         | 0.74                                                  |
| T                       | 0.54                                        | 0.55                                 | 0.53                                    |                                                       |
| C                       | 0.46                                        | 0.45                                 | 0.47                                    |                                                       |
| T/T                     | 0.29                                        | 0.30                                 | 0.28                                    |                                                       |
| T/C                     | 0.50                                        | 0.51                                 | 0.49                                    |                                                       |
| C/C                     | 0.21                                        | 0.19                                 | 0.22                                    |                                                       |
| <b>CYP1A2_rs762551</b>  |                                             |                                      |                                         | 0.67                                                  |
| A                       | 0.68                                        | 0.69                                 | 0.67                                    |                                                       |
| C                       | 0.32                                        | 0.31                                 | 0.33                                    |                                                       |
| A/A                     | 0.46                                        | 0.46                                 | 0.45                                    |                                                       |
| A/C                     | 0.45                                        | 0.45                                 | 0.44                                    |                                                       |
| C/C                     | 0.09                                        | 0.09                                 | 0.10                                    |                                                       |
| <b>CYP2C9_rs1057910</b> |                                             |                                      |                                         | 0.0094                                                |
| A                       | 0.91                                        | 0.91                                 | 0.91                                    |                                                       |
| C                       | 0.09                                        | 0.09                                 | 0.09                                    |                                                       |
| A/A                     | 0.83                                        | 0.83                                 | 0.83                                    |                                                       |
| A/C                     | 0.16                                        | 0.16                                 | 0.15                                    |                                                       |
| C/C                     | 0.01                                        | 0.01                                 | 0.02                                    |                                                       |
| <b>ACSL5_rs17129748</b> |                                             |                                      |                                         | 0.20                                                  |
| T                       | 0.56                                        | 0.55                                 | 0.56                                    |                                                       |
| C                       | 0.44                                        | 0.45                                 | 0.44                                    |                                                       |
| T/T                     | 0.30                                        | 0.30                                 | 0.30                                    |                                                       |
| T/C                     | 0.51                                        | 0.51                                 | 0.51                                    |                                                       |
| C/C                     | 0.19                                        | 0.19                                 | 0.19                                    |                                                       |
| <b>ACSL5_rs2419629</b>  |                                             |                                      |                                         | 0.061                                                 |
| A                       | 0.69                                        | 0.68                                 | 0.7                                     |                                                       |
| G                       | 0.31                                        | 0.32                                 | 0.3                                     |                                                       |
| A/A                     | 0.47                                        | 0.46                                 | 0.48                                    |                                                       |
| A/G                     | 0.45                                        | 0.45                                 | 0.44                                    |                                                       |
| G/G                     | 0.08                                        | 0.09                                 | 0.08                                    |                                                       |
| <b>ACSL5_rs7919710</b>  |                                             |                                      |                                         | 0.66                                                  |
| G                       | 0.59                                        | 0.6                                  | 0.59                                    |                                                       |
| A                       | 0.41                                        | 0.4                                  | 0.41                                    |                                                       |
| G/G                     | 0.35                                        | 0.35                                 | 0.35                                    |                                                       |
| G/A                     | 0.49                                        | 0.49                                 | 0.49                                    |                                                       |
| A/A                     | 0.16                                        | 0.16                                 | 0.16                                    |                                                       |
| <b>PPARG_rs1801282</b>  |                                             |                                      |                                         | 0.11                                                  |
| C                       | 0.94                                        | 0.94                                 | 0.94                                    |                                                       |
| G                       | 0.06                                        | 0.06                                 | 0.06                                    |                                                       |
| C/C                     | 0.89                                        | 0.89                                 | 0.89                                    |                                                       |
| C/G                     | 0.11                                        | 0.11                                 | 0.11                                    |                                                       |
| G/G                     | 0.00                                        | 0.00                                 | 0.00                                    |                                                       |
| <b>PPARG_rs3856806</b>  |                                             |                                      |                                         | 0.068                                                 |
| C                       | 0.93                                        | 0.93                                 | 0.93                                    |                                                       |
| T                       | 0.07                                        | 0.07                                 | 0.07                                    |                                                       |
| C/C                     | 0.86                                        | 0.85                                 | 0.87                                    |                                                       |
| C/T                     | 0.13                                        | 0.14                                 | 0.12                                    |                                                       |
| T/T                     | 0.01                                        | 0.00                                 | 0.01                                    |                                                       |
| <b>PTGS2_rs5275</b>     |                                             |                                      |                                         | 0.43                                                  |
| T                       | 0.67                                        | 0.68                                 | 0.67                                    |                                                       |
| C                       | 0.33                                        | 0.32                                 | 0.33                                    |                                                       |
| T/T                     | 0.45                                        | 0.46                                 | 0.44                                    |                                                       |
| T/C                     | 0.44                                        | 0.43                                 | 0.45                                    |                                                       |
| C/C                     | 0.11                                        | 0.11                                 | 0.11                                    |                                                       |

Nominal p-value  $p < 0.05$

Bonferroni correction  $p < 0.0017$

**Supplementary table II.** Coefficients and p values with the final model of the path analysis.

| <b>Associated variables</b> | <b>Estimate</b> | <b>Std Error</b> | <b>z value</b> | <b>Pr(&gt; z )</b> |
|-----------------------------|-----------------|------------------|----------------|--------------------|
| LIPC_rs12913969 - HDL       | -0,01           | 0,02             | -0,22          | 0,82               |
| LIPC_rs16940302 - HDL       | 0,04            | 0,03             | 1,55           | 0,12               |
| LIPC_rs16940372 - HDL       | 0,09            | 0,02             | 4,96           | 0,0000             |
| LIPC_rs17190510 - HDL       | -0,06           | 0,02             | -2,58          | 0,0099             |
| LIPC_rs1800588 - HDL        | 0,12            | 0,02             | 6,72           | 0,0000             |
| LIPC_rs2099190 - HDL        | 0,09            | 0,02             | 4,90           | 0,0000             |
| LIPC_rs3751542 - HDL        | 0,04            | 0,03             | 1,45           | 0,15               |
| LIPC_rs4774302 - HDL        | -0,11           | 0,02             | -5,19          | 0,0000             |
| LIPC_rs4775053 - HDL        | -0,04           | 0,02             | -2,29          | 0,022              |
| LIPC_rs4775072 - HDL        | -0,04           | 0,02             | -1,57          | 0,12               |
| LIPC_rs6083 - HDL           | 0,02            | 0,03             | 0,63           | 0,53               |
| LIPC_rs634746 - HDL         | -0,05           | 0,03             | -1,68          | 0,094              |
| LIPC_rs7166788 - HDL        | -0,07           | 0,03             | -2,24          | 0,025              |
| LIPC_rs7174210 - HDL        | 0,00            | 0,02             | 0,08           | 0,94               |
| LIPC_rs8035006 - HDL        | 0,03            | 0,02             | 1,53           | 0,12               |
| LIPC_rs9652472 - HDL        | -0,01           | 0,02             | -0,22          | 0,83               |
| LIPC_rs16940302 - CRC       | 0,01            | 0,02             | 0,61           | 0,54               |
| LIPC_rs4775053 - CRC        | -0,03           | 0,02             | -1,65          | 0,10               |
| LIPC_rs9652472 - CRC        | 0,04            | 0,02             | 2,43           | 0,015              |
| APOE_rs405509 - FAT         | -0,04           | 0,03             | -1,09          | 0,28               |
| APOE_rs439401 - FAT         | 0,00            | 0,02             | 0,11           | 0,92               |
| APOE_rs7259620 - FAT        | -0,04           | 0,03             | -1,24          | 0,22               |
| APOE_rs7259620 - CRC        | 0,02            | 0,02             | 1,01           | 0,31               |
| PPARG_rs1801282 - BMI       | 0,05            | 0,02             | 2,38           | 0,017              |
| PPARG_rs3856806 - BMI       | -0,03           | 0,02             | -1,28          | 0,20               |
| PPARG_rs3856806 - CRC       | 0,01            | 0,02             | 0,74           | 0,46               |
| HDL - CRC                   | -0,02           | 0,02             | -1,26          | 0,21               |
| FAT - BMI                   | 0,14            | 0,05             | 2,49           | 0,013              |
| FAT - ENERGY                | 0,95            | 0,01             | 189,64         | 0,0000             |
| FAT - HDL                   | -0,02           | 0,02             | -1,03          | 0,30               |
| FAT - CRC                   | 0,17            | 0,05             | 3,10           | 0,0019             |
| PHYS_ACTIVITY - HDL         | 0,05            | 0,02             | 2,86           | 0,0043             |
| PHYS_ACTIVITY - BMI         | -0,08           | 0,02             | -4,64          | 0,0000             |
| PHYS_ACTIVITY - CRC         | -0,09           | 0,02             | -5,53          | 0,0000             |
| ENERGY - BMI                | -0,17           | 0,05             | -3,08          | 0,0021             |
| ENERGY - CRC                | -0,14           | 0,05             | -2,58          | 0,010              |
| BMI - CRC                   | 0,03            | 0,02             | 1,68           | 0,093              |
